# Supplementary material for: An endophytic microbe from an unusual volcanic swamp corn seeks and inhabits root hair cells to extract rock phosphate
Source: PubMed Central journal article supplement (PMC5647395; doi:10.1038/s41598-017-14080-x), 2017-10-18
Supplement: 41598_2017_14080_MOESM1_ESM.pdf [file 41598_2017_14080_MOESM1_ESM.pdf]

Article to *Scientific Reports*

**An endophytic microbe from an unusual volcanic swamp corn seeks and inhabits root hair cells to extract rock phosphate**

Hanan R. Shehata<sup>1,2</sup>, Christopher Dumigan<sup>1</sup>, Sophia Watts<sup>1</sup> and Manish N. Raizada<sup>1\*</sup>

<sup>1</sup>Department of Plant Agriculture, University of Guelph, Guelph ON Canada N1G 2W1

<sup>2</sup>Department of Microbiology, School of Pharmacy, Mansoura University, Mansoura, Egypt

\*Author for correspondence: [raizada@uoguelph.ca](mailto:raizada@uoguelph.ca)

Department of Plant Agriculture, University of Guelph, Guelph, ON N1G 2W1, Canada

Phone: 1-519-824-4120 x53396

FAX: 1-519-763-8933

**Supplementary Table S1: List of all endophytes isolated from *Zea* seeds used in this study as previously described (Johnston-Monje et al. (2011) PLoS One 6, e20396)**

| <b>ID</b> | <b>Endophyte genus</b>  | <b>Genbank</b> | <b>Host species</b>                                    |
|-----------|-------------------------|----------------|--------------------------------------------------------|
| 3A1       | <i>Pantoea</i>          | JF753401       | <i>Zea mays</i> ssp <i>mays</i> (inbred B73)           |
| 3A2       | <i>Enterobacter</i>     | JF753409       | <i>Zea mays</i> ssp <i>mays</i> (landrace chapalote)   |
| 3A3       | <i>Rhodococcus</i>      | JF753402       | <i>Zea mays</i> ssp <i>mays</i> (inbred B73)           |
| 3A4       | <i>Pseudomonas</i>      | JF753403       | <i>Zea mays</i> ssp <i>mays</i> (inbred B73)           |
| 3A5       | <i>Pantoea</i>          | JF753404       | <i>Zea mays</i> ssp <i>mays</i> (landrace Bolita)      |
| 3A7       | <i>Enterobacter</i>     | JF753407       | <i>Zea mays</i> ssp <i>mays</i> (landrace Bolita)      |
| 3A8       | <i>Enterobacter</i>     | JF753410       | <i>Zea mays</i> ssp <i>mays</i> (landrace Bolita)      |
| 3A9       | <i>Enterobacter</i>     | JF753411       | <i>Zea mays</i> ssp <i>mays</i> (landrace chapalote)   |
| 3A10      | <i>Hafnia</i>           | JF753412       | <i>Zea mays</i> ssp <i>mays</i> (landrace chapalote)   |
| 3A11      | <i>Escherichia coli</i> | JF753413       | <i>Zea mays</i> ssp <i>mays</i> (landrace chapalote)   |
| 3A12      | <i>Burkholderia</i>     | JF753414       | <i>Zea mays</i> ssp <i>mays</i> (landrace chapalote)   |
| 3B1       | <i>Enterobacter</i>     | JF753415       | <i>Zea mays</i> ssp <i>mays</i> (landrace chapalote)   |
| 3B3       | <i>Micrococcus</i>      | JF753417       | <i>Zea mays</i> ssp <i>mays</i> (landrace chapalote)   |
| 3B4       | <i>Pantoea</i>          | JF753491       | <i>Zea mays</i> ssp <i>mays</i> (landrace chapalote)   |
| 3B5       | <i>Enterobacter</i>     | JF753408       | <i>Zea mays</i> ssp <i>mays</i> (landrace chapalote)   |
| 3B6       | <i>Pseudomonas</i>      | JF753420       | <i>Zea mays</i> ssp <i>mays</i> (landrace chapalote)   |
| 3B7       | <i>Enterobacter</i>     | JF753421       | <i>Zea mays</i> ssp <i>mays</i> (landrace chapalote)   |
| 3B9       | <i>Escherichia coli</i> | JF753424       | <i>Zea mays</i> ssp <i>mays</i> (landrace Cristalino)  |
| 3B10      | <i>Staphylococcus</i>   | JF753425       | <i>Zea mays</i> ssp <i>mays</i> (landrace Cristalino)  |
| 3C1       | <i>Enterobacter</i>     | JF753429       | <i>Zea diploperennis</i>                               |
| 3C7       | <i>Enterobacter</i>     | JF753435       | <i>Zea diploperennis</i>                               |
| 3C8       | <i>Pseudomonas</i>      | JF753436       | <i>Zea diploperennis</i>                               |
| 3C9       | <i>Pseudomonas</i>      | JF753440       | <i>Zea diploperennis</i>                               |
| 3C10      | <i>Enterobacter</i>     | JF753441       | <i>Zea diploperennis</i>                               |
| 3C11      | <i>Burkholderia</i>     | KP455296       | <i>Zea diploperennis</i>                               |
| 3C12      | <i>Enterobacter</i>     | JF753449       | <i>Zea diploperennis</i>                               |
| 3D1       | <i>Enterobacter</i>     | JF753450       | <i>Zea diploperennis</i>                               |
| 3D2       | <i>Pantoea</i>          | JF753451       | <i>Zea mays</i> ssp <i>mays</i> (landrace Gaspé Flint) |
| 3D5       | <i>Arthrobacter</i>     | JF753454       | <i>Zea mays</i> ssp <i>mays</i> (landrace Gaspé Flint) |
| 3D6       | <i>Cellulomonas</i>     | JF753455       | <i>Zea mays</i> ssp <i>mays</i> (landrace Gaspé Flint) |
| 3D7       | <i>Pantoea</i>          | JF753456       | <i>Zea mays</i> ssp <i>mays</i> (landrace Jala)        |
| 3D8       | <i>Arthrobacter</i>     | JF753458       | <i>Zea nicaraguensis</i>                               |
| 3D9       | <i>Enterobacter</i>     | JF753460       | <i>Zea nicaraguensis</i>                               |
| 3D10      | <i>Enterobacter</i>     | JF753461       | <i>Zea nicaraguensis</i>                               |
| 3D11      | <i>Pantoea</i>          | JF753462       | <i>Zea nicaraguensis</i>                               |
| 3D12      | <i>Enterobacter</i>     | JF753469       | <i>Zea nicaraguensis</i>                               |
| 3 E1      | <i>Enterobacter</i>     | JF753463       | <i>Zea nicaraguensis</i>                               |
| 3 E2      | <i>Stenotrophomonas</i> | JF753464       | <i>Zea nicaraguensis</i>                               |
| 3 E3      | <i>Stenotrophomonas</i> | JF753465       | <i>Zea nicaraguensis</i>                               |
| 3 E4      | <i>Klebsiella</i>       | JF753466       | <i>Zea nicaraguensis</i>                               |
| 3 E5      | <i>Citrobacter</i>      | JF753467       | <i>Zea nicaraguensis</i>                               |
| 3 E6      | <i>Pantoea</i>          | JF753468       | <i>Zea nicaraguensis</i>                               |

|       |                         |          |                                                |
|-------|-------------------------|----------|------------------------------------------------|
| 3 E7  | <i>Paenibacillus</i>    | JF753470 | <i>Zea nicaraguensis</i>                       |
| 3 E9  | <i>Microbacterium</i>   | JF753473 | <i>Zea nicaraguensis</i>                       |
| 3 E10 | <i>Paenibacillus</i>    | JF753475 | <i>Zea nicaraguensis</i>                       |
| 3 E11 | <i>Pantoea</i>          | JF753477 | <i>Zea nicaraguensis</i>                       |
| 3 E12 | <i>Pantoea</i>          | JF753478 | <i>Zea mays ssp mexicana</i>                   |
| 3F2   | <i>Pseudomonas</i>      | JF753483 | <i>Zea mays ssp mexicana</i>                   |
| 3F3   | <i>Pantoea</i>          | JF753484 | <i>Zea mays ssp mexicana</i>                   |
| 3F6   | <i>Pseudomonas</i>      | JF753488 | <i>Zea mays ssp mexicana</i>                   |
| 3F7   | <i>Pantoea</i>          | JF753489 | <i>Zea mays ssp mexicana</i>                   |
| 3F9   | <i>Burkholderia</i>     | JF753492 | <i>Zea mays ssp mays</i> (landrace mixteco)    |
| 3F10  | <i>Burkholderia</i>     | JF753493 | <i>Zea mays ssp mays</i> (landrace mixteco)    |
| 3F11  | <i>Enterobacter</i>     | KR780032 | <i>Zea nicaraguensis</i>                       |
| 3G1   | <i>Methylobacterium</i> | JF753495 | <i>Zea mays ssp mays</i> (landrace nal-Tel)    |
| 3G2   | <i>Paenibacillus</i>    | JF753496 | <i>Zea mays ssp mays</i> (landrace nal-Tel)    |
| 3G3   | <i>Stenotrophomonas</i> | JF753490 | <i>Zea mays ssp mays</i> (landrace nal-Tel)    |
| 3G4   | <i>Pantoea</i>          | JF753497 | <i>Zea mays ssp parviglumis</i>                |
| 3G6   | <i>Stenotrophomonas</i> | JF753499 | <i>Zea mays ssp parviglumis</i>                |
| 3G7   | <i>Pantoea</i>          | JF753500 | <i>Zea mays ssp parviglumis</i>                |
| 3G8   | <i>Klebsiella</i>       | JF753501 | <i>Zea mays ssp parviglumis</i>                |
| 3G9   | <i>Paenibacillus</i>    | JF753471 | <i>Zea nicaraguensis</i>                       |
| 3G10  | <i>Klebsiella</i>       | KU214888 | <i>Zea mays ssp parviglumis</i>                |
| 3G11  | <i>Paenibacillus</i>    | JF753509 | <i>Zea mays ssp parviglumis</i>                |
| 3H1   | <i>Bacillus</i>         | JF753511 | <i>Zea mays ssp mays</i> (inbred Pioneer 3751) |
| 3H2   | <i>Deinococcus</i>      | JF753512 | <i>Zea mays ssp mays</i> (inbred Pioneer 3751) |
| 3H3   | <i>Deinococcus</i>      | JF753513 | <i>Zea mays ssp mays</i> (inbred Pioneer 3751) |
| 3H4   | <i>Rhodococcus</i>      | JF753514 | <i>Zea mays ssp mays</i> (inbred Pioneer 3751) |
| 3H5   | <i>Microbacterium</i>   | JF753515 | <i>Zea mays ssp mays</i> (inbred Pioneer 3751) |
| 3H8   | <i>Bacillus</i>         | JF753518 | <i>Zea mays ssp mays</i> (inbred Pioneer 3751) |
| 3H9   | <i>Methylobacterium</i> | JF753519 | <i>Zea mays ssp mays</i> (inbred Pioneer 3751) |
| 3H10  | <i>Bradyrhizobium</i>   | JF753520 | <i>Zea mays ssp mays</i> (landrace Tuxpeno)    |
| 3H11  | <i>Rhodococcus</i>      | KU214889 | <i>Zea mays ssp mays</i> (inbred Pioneer 3751) |

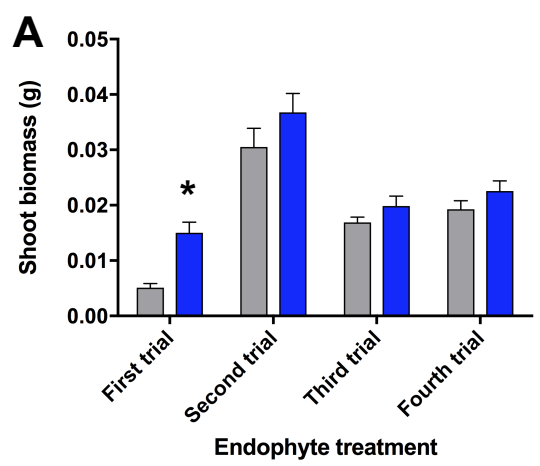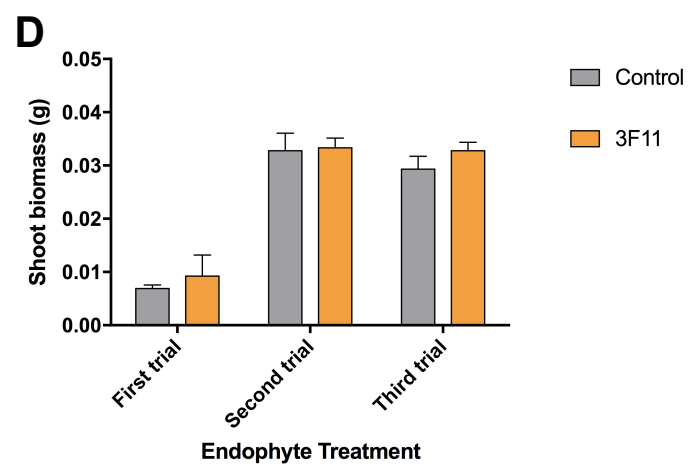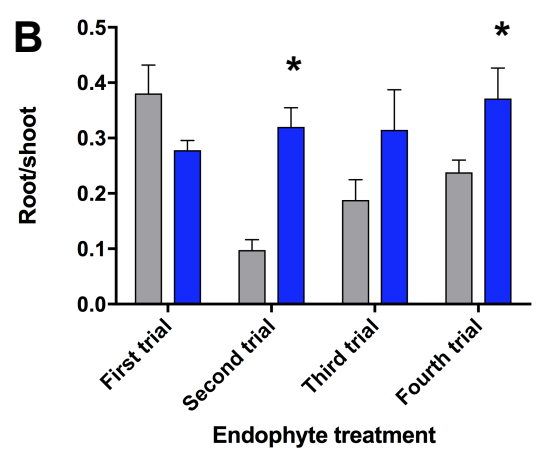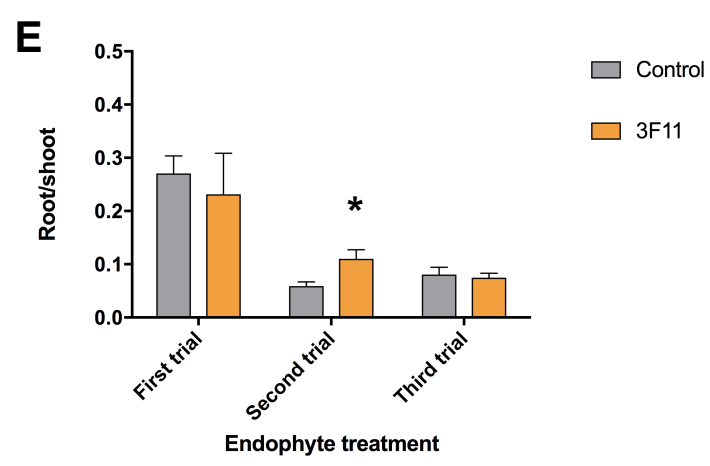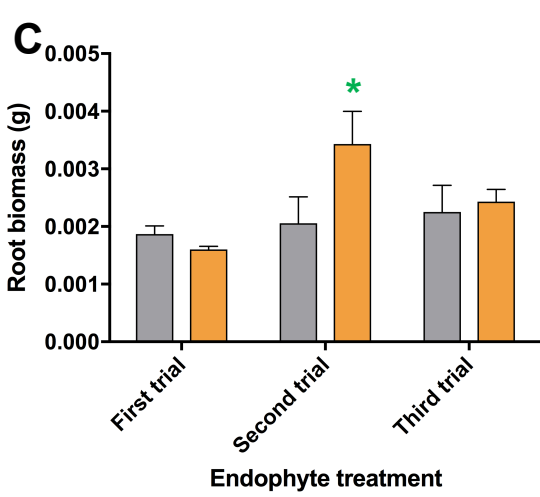

Fig S1

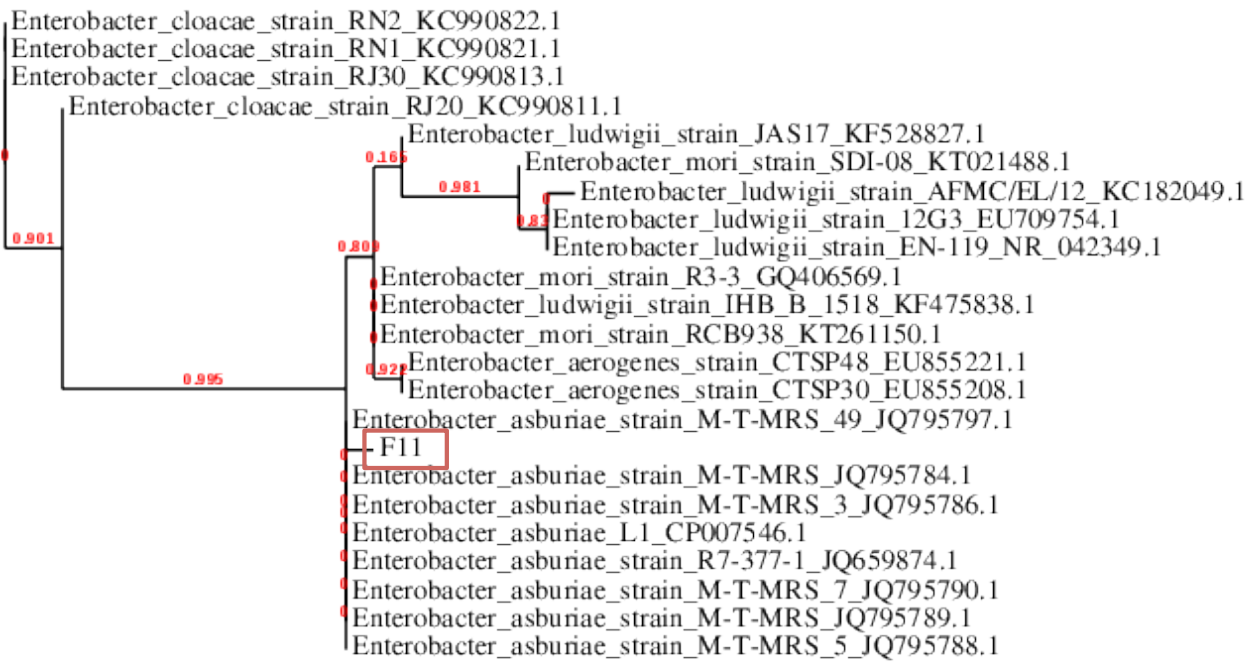

0.07

Fig S2

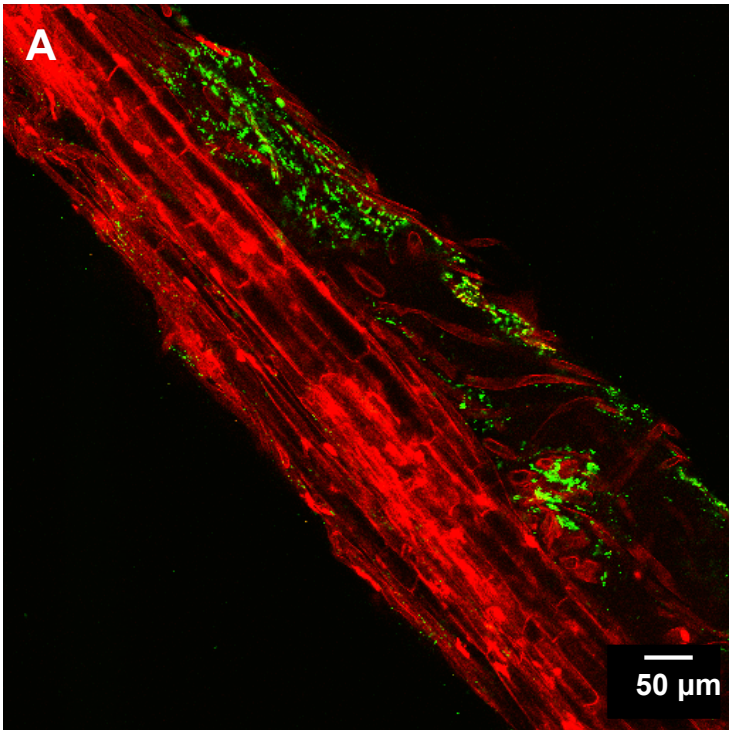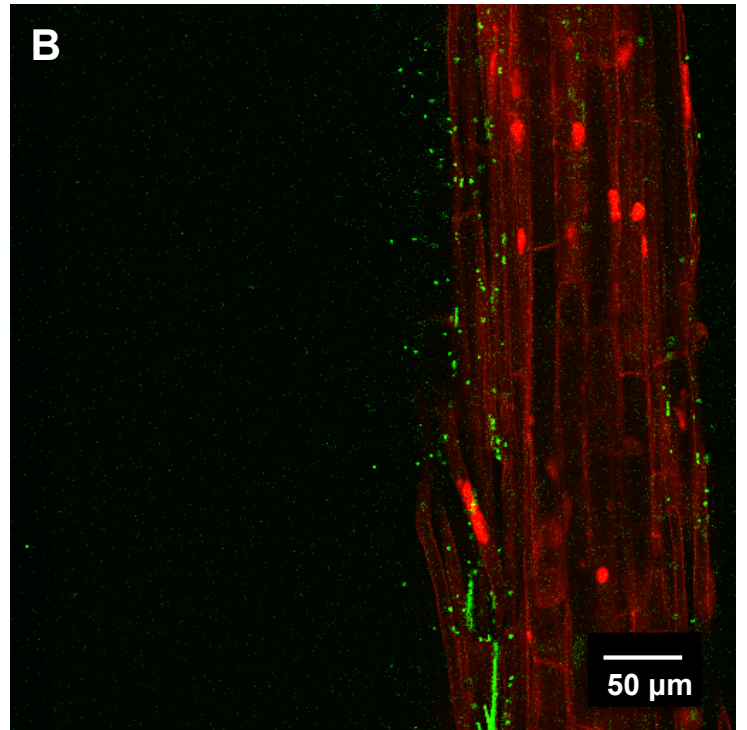

Fig S3

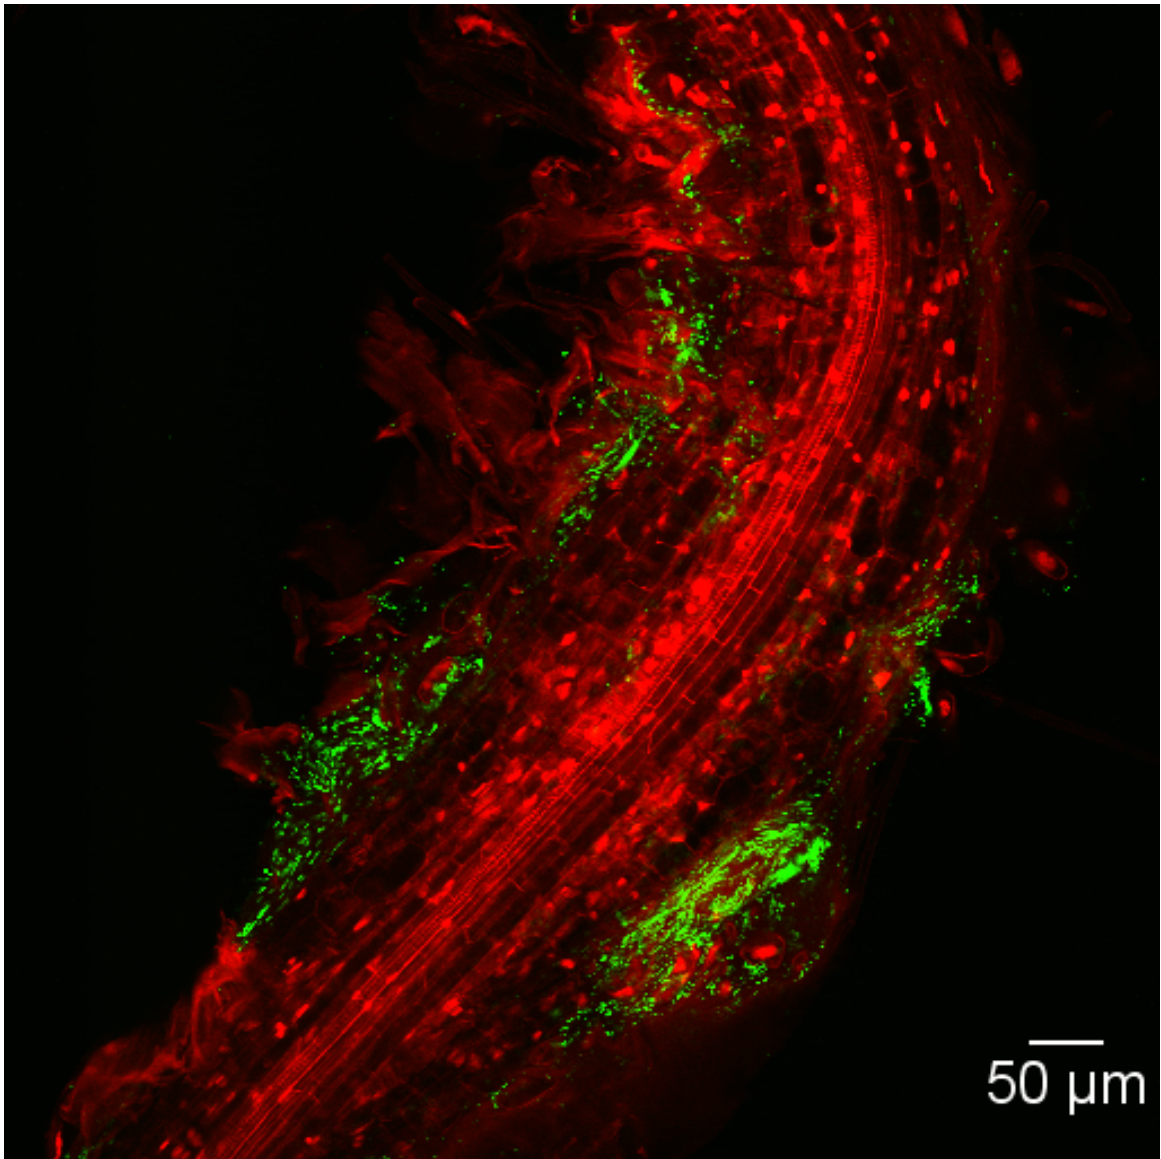

Fig S4

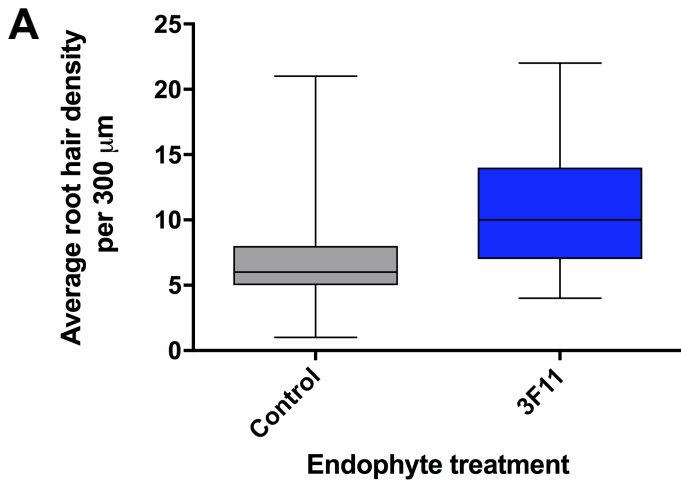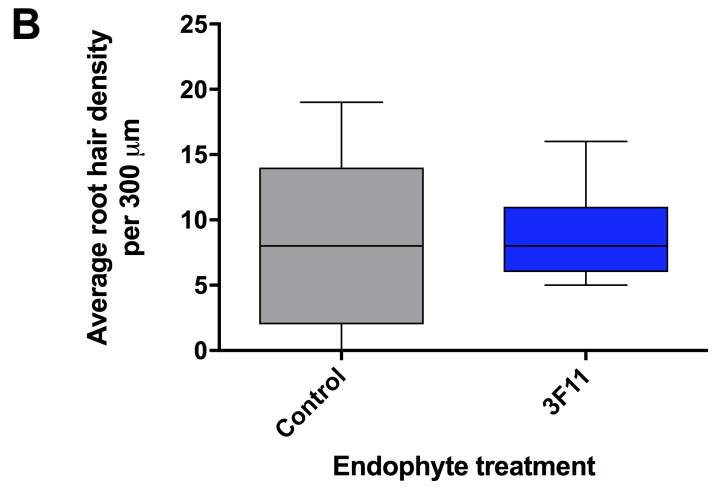

Fig S5



## Supplementary information

**Table S1: List of all *Zea* seed associated endophytes used in this study as previously described <sup>25</sup>.**

**Figure S1: Test of *Zea nicaraguensis* endophyte 3F11 for growth promotion of P-hyperaccumulating annual ryegrass.** (A-B) 3F11 seed-coated plants were grown on rock P containing medium as the sole P source, and tested for (A) shoot biomass, and (B) root/shoot biomass ratio after 4-5 weeks of growth. Shown are 4 independent trials (n=3 plants for trial 1; n=7 for trial 2; n=15 for trials 3 and 4). (C-E) Seed coated plants were grown on soluble P containing medium, and tested for (C) root biomass, (D) shoot biomass, and (E) root/shoot biomass ratio after 4-5 weeks of growth. Shown are 3 independent trials (n=3 plants for trial 1; n=7 for trials 2 and 3). The black asterisk indicates that the mean is significantly different at  $p=0.05$  from the control. The green asterisk indicates significance at  $p=0.10$ . The histograms represent the mean values, and the error bars represent the standard error of the mean (SEM).

**Figure S2: 16S phylogenetic tree for taxonomic identification of endophyte 3F11.**

16S sequences were obtained from GenBank to construct a phylogenetic tree using Phylogeny.lirmm.fr using default parameters.

**Figure S3: Colonization of GFP-tagged 3F11 cells on annual ryegrass roots germinated from endophyte-coated seeds.** (A-B) Representative confocal microscopy images showing colonization of GFP tagged 3F11 cells in annual ryegrass roots grown for 15 days on (A) rock P. (B) soluble P, showing the difference in the magnitude of colonization.

**Figure S4. Localization of endophyte 3F11 on annual ryegrass roots germinated from endophyte-coated seeds, 15 days after planting showing extensive colonization of the surfaces of root hairs.**

**Figure S5. Effect of endophyte 3F11 on root hair density when seed-inoculated plants were grown on media containing rock P as the sole P source for 4-5 weeks.** Shown are 2 independent trials: (A) first trial, and (B) second trial (n=5 plants per treatment). The error bars represent the standard error of the mean (SEM). There was no significant difference in root hair density between 3F11 inoculated plants and control uninoculated plants.

**Video S1: Localization of GFP-tagged 3F11 in annual ryegrass roots germinated from endophyte-coated seeds, at 15 days after planting, showing extensive colonization of root hairs.**

**Video S2: Trapping of GFP-tagged 3F11 cells between root hairs of annual ryegrass at 15 days after planting following germination of 3F11-coated seeds.**
